# Supplementary material
Source: HighWire-hosted journal article supplement (https://www.cmaj.ca/highwire/filestream/60024/field_highwire_adjunct_files/4/161379-res-4-at.pdf)
Supplement: 161379-res-4-at.pdf [file 161379-res-4-at.pdf]

## Appendix 4 (as supplied by the authors): Leave-one-out cross validation methods

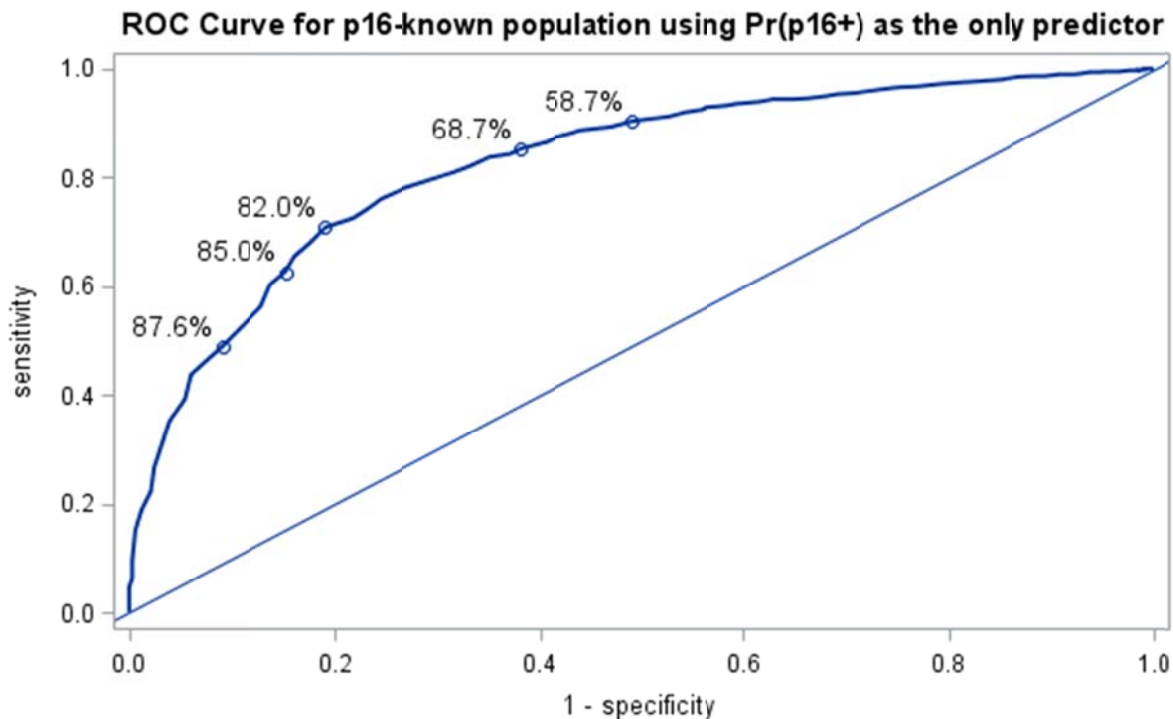

| Cut-off of Pr(p16+) | Sensitivity | Specificity |
|---------------------|-------------|-------------|
| 58.7%               | 90%         | 51%         |
| 68.7%               | 85%         | 62%         |
| 82.0% (optimal)     | 71%         | 81%         |
| 85.0%               | 63%         | 85%         |
| 87.6%               | 49%         | 90%         |

**Caption:** The OPC population with known p16 status was used as the validation subset (leave-one-out validation). For each patient in the validation subset (n=1282), p16 status was iteratively assumed missing and estimated using 100 imputations (as described in the methods) using the remaining validation subset population (n=1281). Thus, 1282 sets of 100 imputations was performed and Pr(p16+) was recorded for each patient with known p16 status. Using Pr(p16+) as the only predictor of p16 status in the validation subset, Receiver Operator Characteristic (ROC) curve analysis was conducted to evaluate the predictive ability of different cut-points of Pr(p16+). The optimal cut-point was defined as the value of Pr(p16+) that maximized the sum of specificity and sensitivity of predicting the true p16 status. Other cut-points (85%, 90% sensitivity, and 85%, 90% specificity) were also evaluated. The points on the graph (○) represent cut-points of Pr(p16+).
